# Supplementary material
Source: MDPI journal article supplement (https://www.mdpi.com/1999-4907/13/1/125)
Supplement: s1 [file s1]

**Supplement Table S1.** List of sites with litter decomposition studies, their geographic location, altitude, mean annual precipitation (MAP), and mean annual temperature (MAT). The tree species are Scots pine and Norway spruce in monocultures. Paired stands are indicated. The site numbers are those used in previous publications.

| Site Name       | Site number | Lat/long            | Altitude (m asl) | MAP (mm) | MAT (°C) | Species                     |
|-----------------|-------------|---------------------|------------------|----------|----------|-----------------------------|
| Skällarimsheden | 106         | 66°32'N<br>20°11'E  | 280              | 490      | -0.5     | Scots pine                  |
| Ätnakobbo       | 109         | 66°22'N<br>20°02'E  | 405              | 469      | -1.7     | Norway spruce               |
| Harads          | 002         | 66°08'N;<br>20°53'E | 58               | 650      | 1.3      | Scots pine                  |
| Manjärv         | 003:1       | 65°47'N;<br>20°37'E | 135              | 516      | 0.2      | Scots pine                  |
| Manjärv         | 003:2       | 65°47'N;<br>20°37'E | 135              | 516      | 0.2      | Scots pine                  |
| Manjärv         | 003:3       | 65°47'N;<br>20°37'E | 135              | 516      | 0.2      | Scots pine                  |
| Norrliden       | 004:23      | 64°21'N;<br>19°46'E | 260              | 595      | 1.2      | Scots pine                  |
| Västbyn         | 108         | 63°13'N<br>14°28'E  | 325              | 460      | 2.1      | Scots pine<br>Norway spruce |
| Stråsan         | 005         | 60°55'N<br>16°01'E  | 350              | 775      | 3.4      | Norway spruce               |
| Jädraås         | 006:51      | 60°49'N;<br>16°01'E | 185              | 609      | 3.8      | Scots pine                  |
| Anundberget     | 018         | 60°38'N;<br>13°37'E | 400              | 450      | 2.0      | Scots pine                  |
| Kappsjön        | 017         | 60°33'N;<br>13°44'E | 375              | 450      | 2.8      | Scots pine                  |
| Hässlen         | 111         | 60°16'N<br>16°15'E  | 185              | 425      | 4.2      | Norway spruce               |
| Månkarbo        | 112         | 60°14'N<br>17°28'E  | 40               | 580      | 4.4      | Norway spruce               |
| Tomta           | 103         | 59°49'N<br>16°33'E  | 63               | 550      | 5.1      | Scots pine<br>Norway spruce |
| Kungs-Husby     | 102         | 59°31'N<br>17°16'E  | 30               | 470      | 5.2      | Scots pine<br>Norway spruce |
| Dimbo           | 100         | 59°07'N<br>15°44'E  | 70               | 560      | 5.5      | Scots pine                  |
| Grensholm       | 101         | 58°33'N<br>15°51'E  | 58               | 520      | 6.1      | Scots pine<br>Norway spruce |
| Remningstorp    | 105         | 58°28'N             | 128              | 530      | 5.6      | Scots pine                  |

|                |     |                     |     |      |     |                             |
|----------------|-----|---------------------|-----|------|-----|-----------------------------|
|                |     | 13°39'E             |     |      |     | Norway spruce               |
| Tveten         | 104 | 58°06'N<br>13°17'E  | 170 | 675  | 5.5 | Scots pine<br>Norway spruce |
| Sänksjön       | 107 | 58°04'N;<br>14°08'E | 245 | 595  | 5.1 | Scots pine                  |
| Tönnersjöheden | 113 | 56°42'N<br>13°05'E  | 80  | 870  | 7.2 | Norway spruce               |
| Mästocka       | 010 | 56°36'N<br>13°15'E  | 135 | 1070 | 6.8 | Scots pine<br>Norway spruce |
| Farabol        |     | 56°26'N<br>14°35'E  | 140 | 660  | 5.7 | Norway spruce               |
